# Supplementary material
Source: PubMed Central journal article supplement (PMC4826850)
Supplement: NIHMS736505-supplement-Supp_TableS1-S2_Fig1-11.pdf [file NIHMS736505-supplement-Supp_TableS1-S2_Fig1-11.pdf]

**Supporting Information for  
“An evaluation of constrained randomization for the design and  
analysis of group-randomized trials”**

Fan Li, Yuliya Lokhnygina, David M. Murray, Patrick J. Heagerty and Elizabeth R. DeLong\*  
\*elizabeth.delong@dm.duke.edu

**Web Tables**

**Web Table 1.** Type I error rate for the unadjusted and adjusted tests under simple versus constrained randomization using total balance score (TB) with  $g = 7$  and  $g = 11$ . All four group-level potential confounders were adjusted in constrained randomization ( $S = 4$ ) and in any given adjusted test; candidate set size ( $R$ ) are varied under constrained randomization.

|             |               | Type I error rate |       |              |              |            |            |       |
|-------------|---------------|-------------------|-------|--------------|--------------|------------|------------|-------|
|             | Randomization | ICC               | $R$   | Unadj F-test | Unadj P-test | Adj F-test | Adj P-test |       |
| $g = 7$     | Constrained   | 0.01              | 20    | 0.002        | –            | 0.050      | –          |       |
|             | Constrained   | 0.01              | 100   | 0.001        | 0.039        | 0.051      | 0.039      |       |
|             | Constrained   | 0.01              | 1000  | 0.002        | 0.051        | 0.048      | 0.047      |       |
|             | Constrained   | 0.01              | 2000  | 0.007        | 0.048        | 0.047      | 0.047      |       |
|             | Constrained   | 0.01              | 3000  | 0.026        | 0.049        | 0.049      | 0.051      |       |
|             | Simple        | 0.01              | –     | 0.051        | 0.046        | 0.049      | 0.047      |       |
|             | Constrained   | 0.1               | 20    | 0.001        | –            | 0.050      | –          |       |
|             | Constrained   | 0.1               | 100   | 0.002        | 0.041        | 0.051      | 0.037      |       |
|             | Constrained   | 0.1               | 1000  | 0.004        | 0.049        | 0.049      | 0.049      |       |
|             | Constrained   | 0.1               | 2000  | 0.012        | 0.050        | 0.053      | 0.049      |       |
|             | Constrained   | 0.1               | 3000  | 0.027        | 0.051        | 0.052      | 0.048      |       |
|             | Simple        | 0.1               | –     | 0.058        | 0.048        | 0.048      | 0.049      |       |
|             | $g = 11$      | Constrained       | 0.01  | 20           | 0.000        | –          | 0.049      | –     |
|             |               | Constrained       | 0.01  | 100          | 0.000        | 0.039      | 0.051      | 0.042 |
| Constrained |               | 0.01              | 1000  | 0.000        | 0.050        | 0.056      | 0.054      |       |
| Constrained |               | 0.01              | 5000  | 0.000        | 0.050        | 0.049      | 0.050      |       |
| Constrained |               | 0.01              | 10000 | 0.003        | 0.053        | 0.047      | 0.047      |       |
| Simple      |               | 0.01              | –     | 0.051        | 0.047        | 0.052      | 0.048      |       |
| Constrained |               | 0.1               | 20    | 0.000        | –            | 0.047      | –          |       |
| Constrained |               | 0.1               | 100   | 0.000        | 0.037        | 0.049      | 0.040      |       |
| Constrained |               | 0.1               | 1000  | 0.000        | 0.048        | 0.053      | 0.052      |       |
| Constrained |               | 0.1               | 5000  | 0.001        | 0.049        | 0.051      | 0.051      |       |
| Constrained |               | 0.1               | 10000 | 0.007        | 0.052        | 0.049      | 0.048      |       |
| Simple      |               | 0.1               | –     | 0.047        | 0.047        | 0.048      | 0.051      |       |

**Web Table 2.** Power for the unadjusted and adjusted tests under simple versus constrained randomization using total balance score (TB) with  $g = 7$  and  $g = 11$ . All four group-level potential confounders were adjusted in constrained randomization ( $S = 4$ ) and in any given adjusted test; candidate set size ( $R$ ) are varied under constrained randomization.

|             | Randomization | ICC         | $R$   | Power        |              |            |            |       |
|-------------|---------------|-------------|-------|--------------|--------------|------------|------------|-------|
|             |               |             |       | Unadj F-test | Unadj P-test | Adj F-test | Adj P-test |       |
| $g = 7$     | Constrained   | 0.01        | 20    | 0.002        | –            | 1.000      | –          |       |
|             | Constrained   | 0.01        | 100   | 0.020        | 0.426        | 1.000      | 0.998      |       |
|             | Constrained   | 0.01        | 1000  | 0.055        | 0.304        | 1.000      | 0.998      |       |
|             | Constrained   | 0.01        | 2000  | 0.094        | 0.227        | 1.000      | 0.993      |       |
|             | Constrained   | 0.01        | 3000  | 0.133        | 0.173        | 0.998      | 0.974      |       |
|             | Simple        | 0.01        | –     | 0.148        | 0.143        | 0.996      | 0.946      |       |
|             | Constrained   | 0.1         | 20    | 0.030        | –            | 0.644      | –          |       |
|             | Constrained   | 0.1         | 100   | 0.029        | 0.294        | 0.644      | 0.524      |       |
|             | Constrained   | 0.1         | 1000  | 0.059        | 0.234        | 0.595      | 0.561      |       |
|             | Constrained   | 0.1         | 2000  | 0.093        | 0.195        | 0.576      | 0.548      |       |
|             | Constrained   | 0.1         | 3000  | 0.123        | 0.154        | 0.542      | 0.510      |       |
|             | Simple        | 0.1         | –     | 0.137        | 0.135        | 0.516      | 0.477      |       |
|             | $g = 11$      | Constrained | 0.01  | 20           | 0.030        | –          | 1.000      | –     |
|             |               | Constrained | 0.01  | 100          | 0.033        | 0.800      | 1.000      | 1.000 |
| Constrained |               | 0.01        | 1000  | 0.044        | 0.764        | 1.000      | 1.000      |       |
| Constrained |               | 0.01        | 5000  | 0.112        | 0.499        | 1.000      | 1.000      |       |
| Constrained |               | 0.01        | 10000 | 0.165        | 0.392        | 1.000      | 1.000      |       |
| Simple      |               | 0.01        | –     | 0.223        | 0.220        | 1.000      | 0.999      |       |
| Constrained |               | 0.1         | 20    | 0.052        | –            | 0.891      | –          |       |
| Constrained |               | 0.1         | 100   | 0.053        | 0.580        | 0.890      | 0.842      |       |
| Constrained |               | 0.1         | 1000  | 0.060        | 0.576        | 0.886      | 0.879      |       |
| Constrained |               | 0.1         | 5000  | 0.109        | 0.402        | 0.879      | 0.873      |       |
| Constrained |               | 0.1         | 10000 | 0.151        | 0.329        | 0.860      | 0.850      |       |
| Simple      |               | 0.1         | –     | 0.202        | 0.201        | 0.827      | 0.800      |       |

## Web Figures

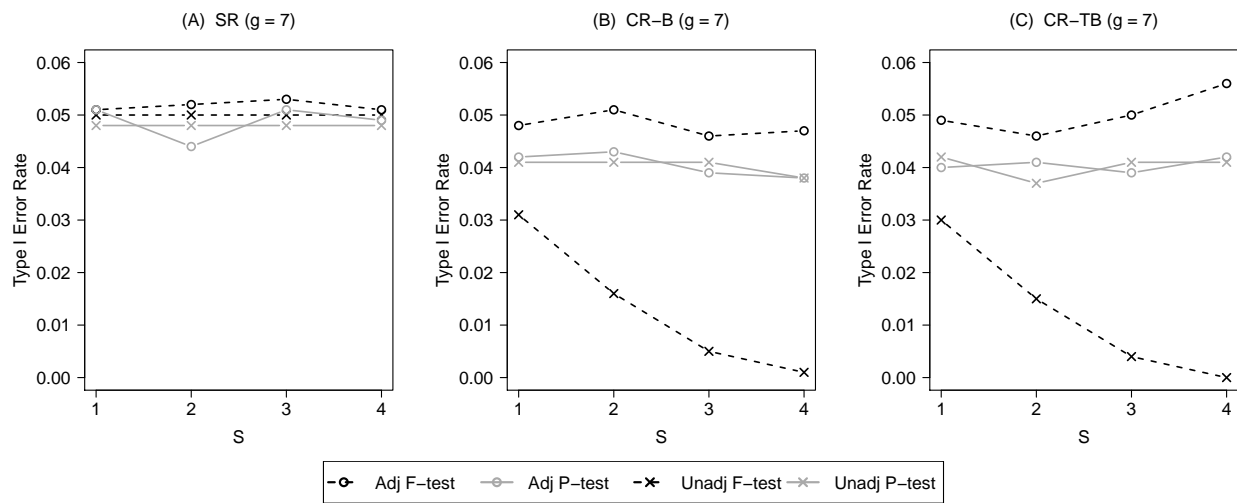

**Web Figure 1.** Type I error rate for F-test and permutation test with different number of group-level potential confounders ( $S$ ) controlled in constrained randomization (CR) versus under simple randomization (SR); B: imbalance score, TB: total balance score,  $g = 7$ ; ICC = 0.05,  $R = 100$ .

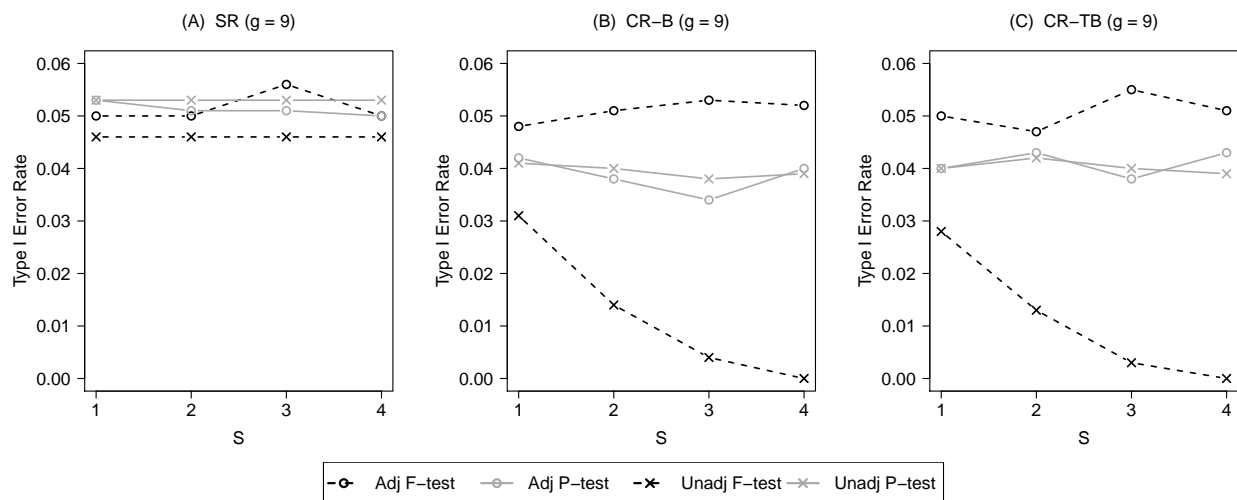

**Web Figure 2.** Type I error rate for F-test and permutation test with different number of group-level potential confounders ( $S$ ) controlled in constrained randomization (CR) versus under simple randomization (SR); B: imbalance score, TB: total balance score,  $g = 9$ ; ICC = 0.05,  $R = 100$ .

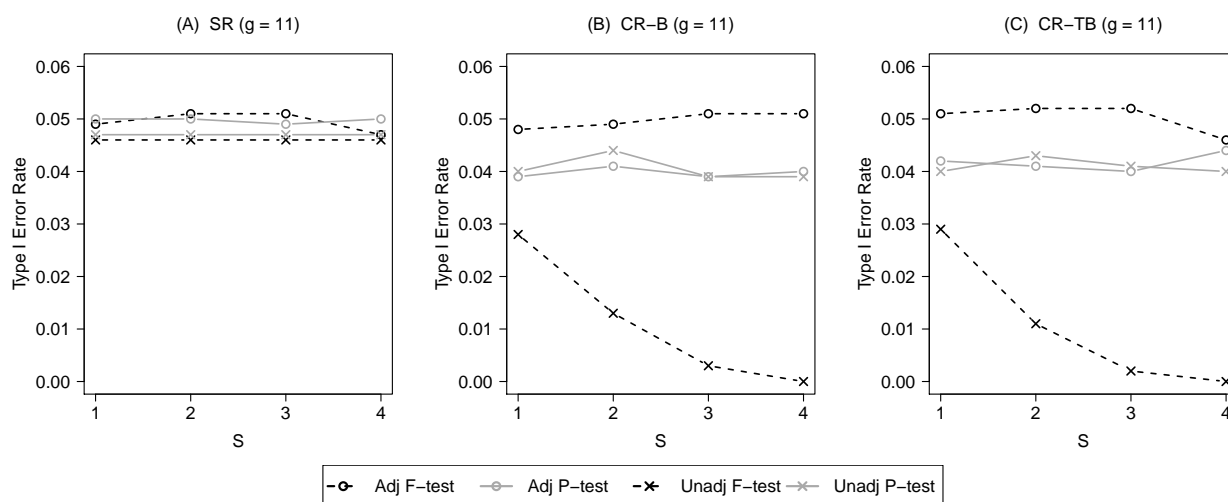

**Web Figure 3.** Type I error rate for F-test and permutation test with different number of group-level potential confounders ( $S$ ) controlled in constrained randomization (CR) versus under simple randomization (SR); B: imbalance score, TB: total balance score,  $g = 11$ ; ICC = 0.05,  $R = 100$ .

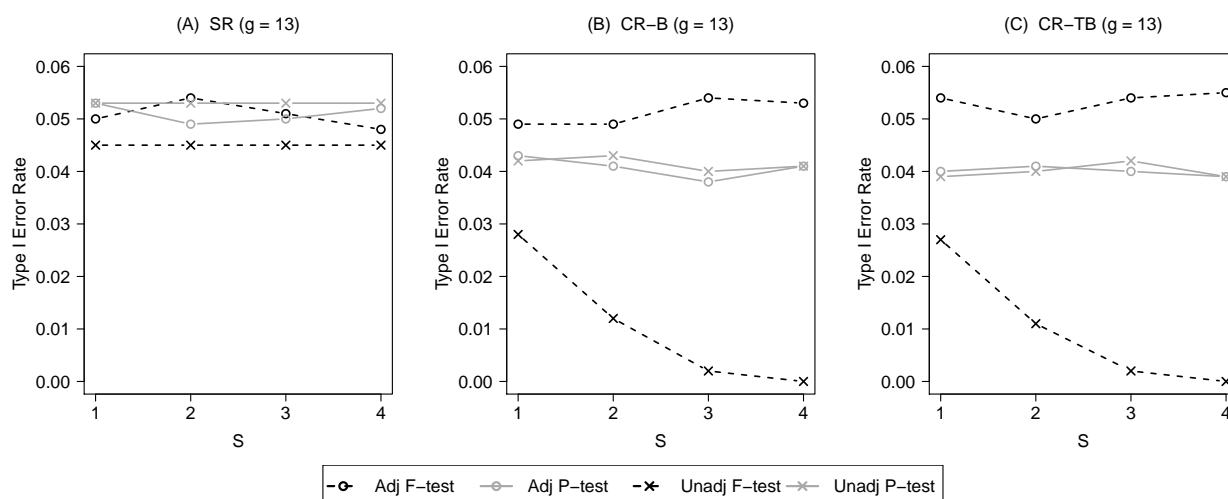

**Web Figure 4.** Type I error rate for F-test and permutation test with different number of group-level potential confounders ( $S$ ) controlled in constrained randomization (CR) versus under simple randomization (SR); B: imbalance score, TB: total balance score,  $g = 13$ ; ICC = 0.05,  $R = 100$ .

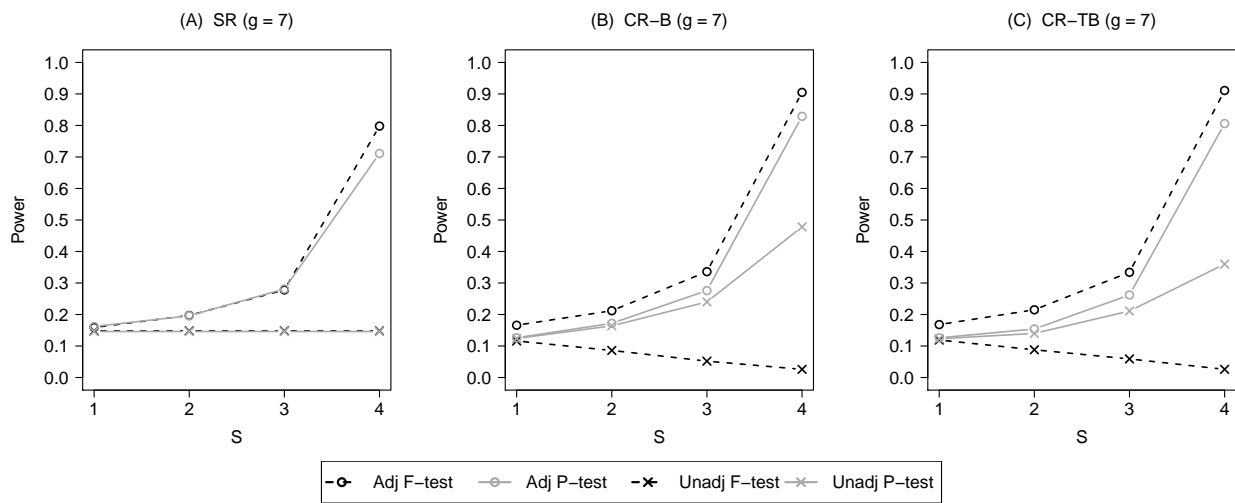

**Web Figure 5.** Power for F-test and permutation test with different number of group-level potential confounders ( $S$ ) controlled in constrained randomization (CR) versus under simple randomization (SR); B: imbalance score, TB: total balance score,  $g = 7$ ; ICC = 0.05,  $R = 100$ .

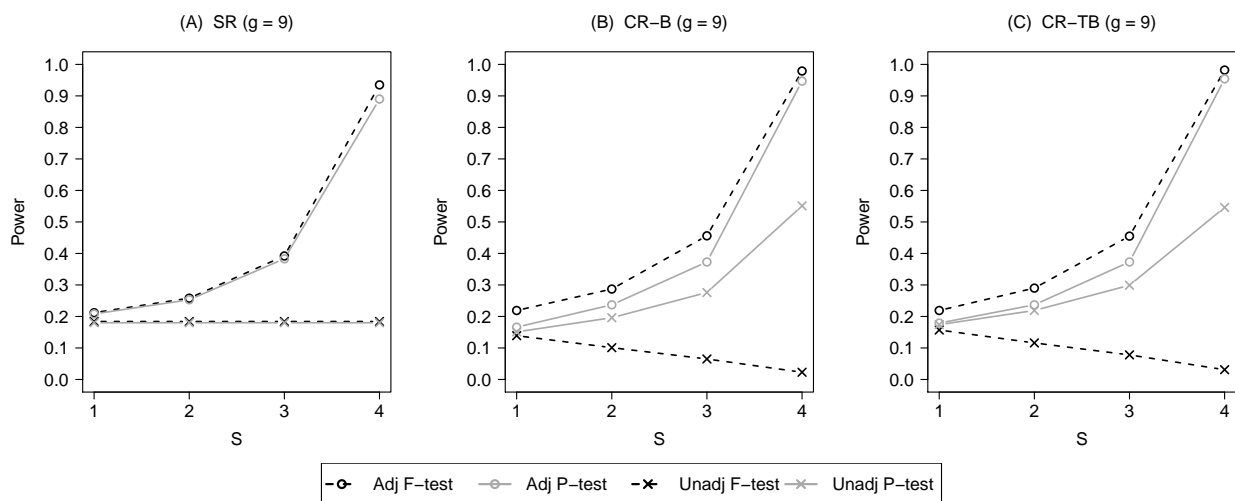

**Web Figure 6.** Power for F-test and permutation test with different number of group-level potential confounders ( $S$ ) controlled in constrained randomization (CR) versus under simple randomization (SR); B: imbalance score, TB: total balance score,  $g = 9$ ; ICC = 0.05,  $R = 100$ .

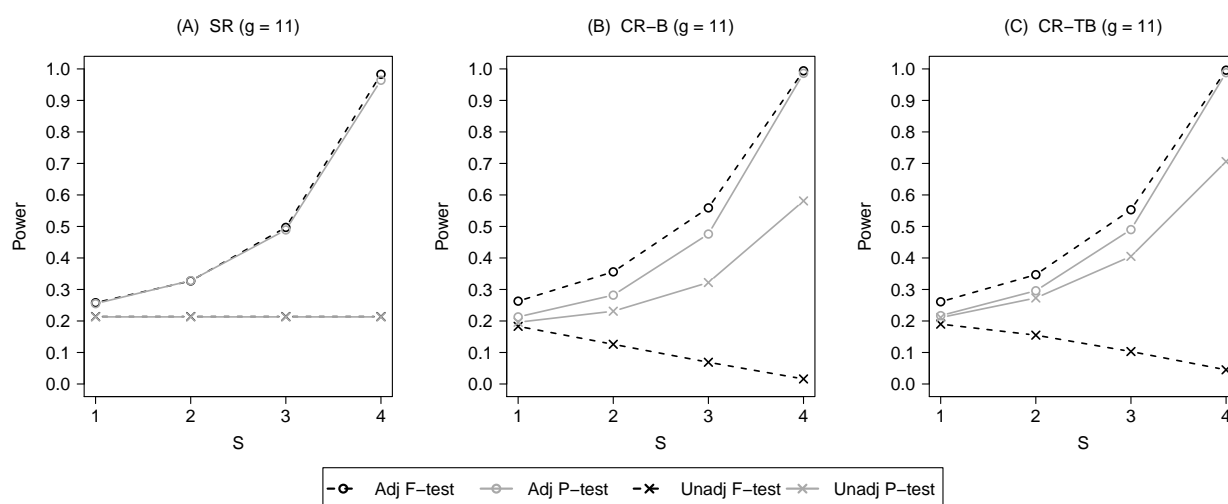

**Web Figure 7.** Power for F-test and permutation test with different number of group-level potential confounders ( $S$ ) controlled in constrained randomization (CR) versus under simple randomization (SR); B: imbalance score, TB: total balance score,  $g = 11$ ; ICC = 0.05,  $R = 100$ .

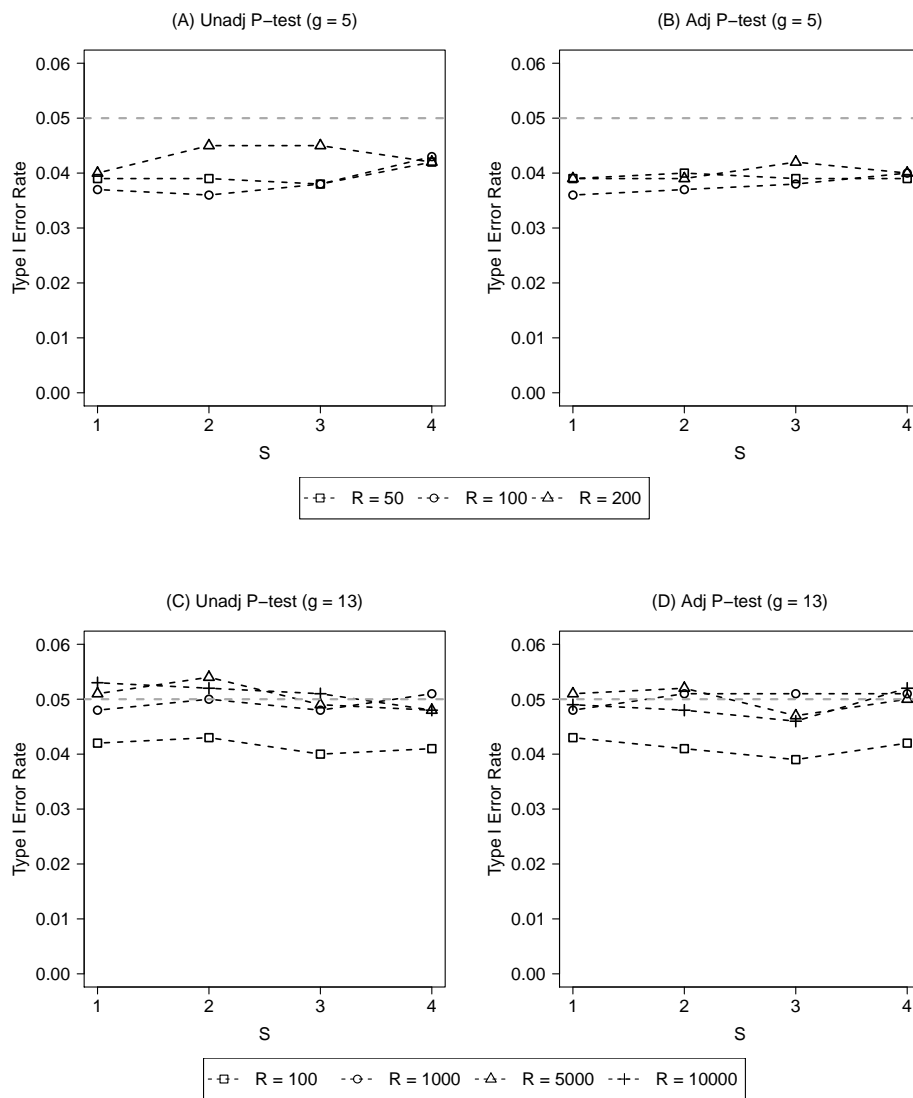

**Web Figure 8.** Type I error rate for the unadjusted and adjusted permutation tests under constrained randomization (B Metric) with different candidate set sizes;  $g = 5$  and 13;  $ICC = 0.05$ . For the unadjusted permutation tests (panels A and C),  $S$  represents the number of group-level potential confounders controlled by CR only; for the adjusted permutation tests (panels B and D),  $S$  represents the number of group-level potential confounders controlled by both CR and regression modeling.  $R$  represents candidate set size and the gray dashed horizontal line indicates the nominal Type I error rate.

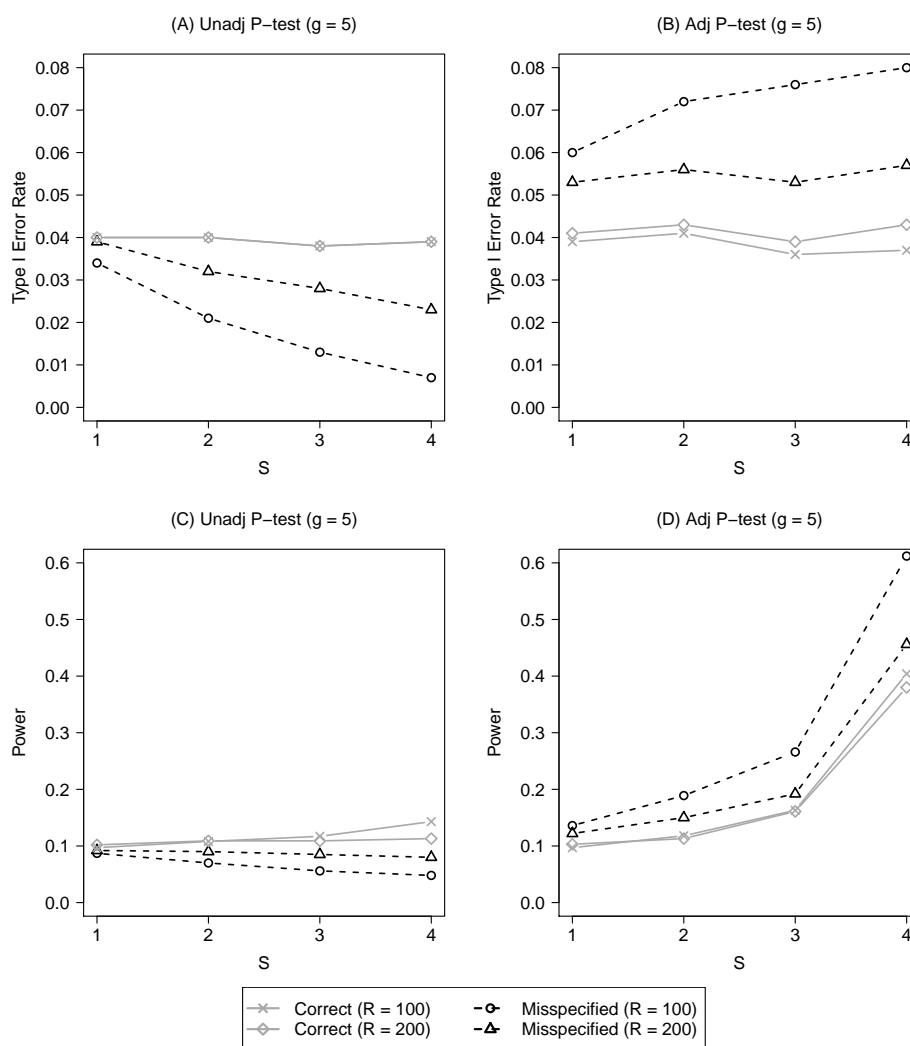

**Web Figure 9.** Type I error rate and power for unadjusted and adjusted P-tests under constrained randomization using total balance score (TB) with  $g = 5$  and  $ICC = 0.05$  when the permutational distribution is misspecified. The results are referenced against the correct permutation analyses from the appropriate distribution.  $R$ : candidate set size.



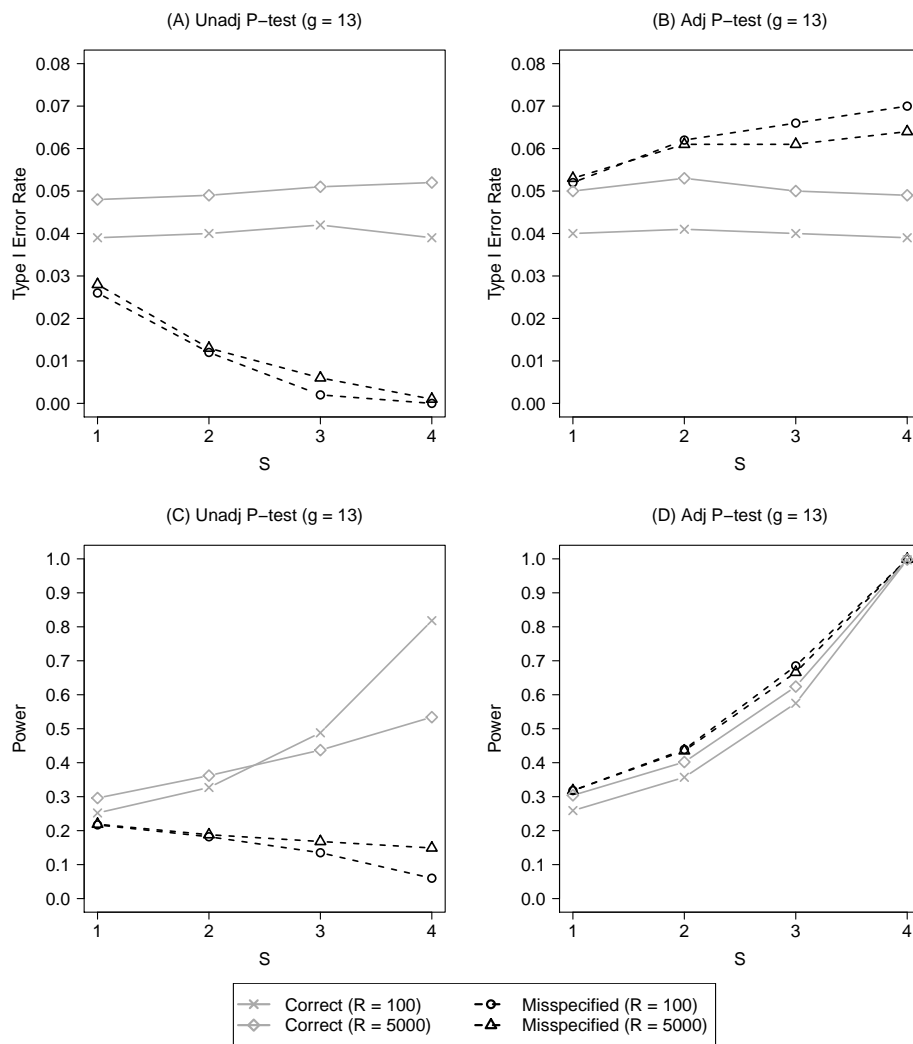

**Web Figure 10.** Type I error rate and power for unadjusted and adjusted P-tests under constrained randomization using total balance score (TB) with  $g = 13$  and  $ICC = 0.05$  when the permutational distribution is misspecified. The results are referenced against the correct permutational analyses from the appropriate distribution.  $R$ : candidate set size.

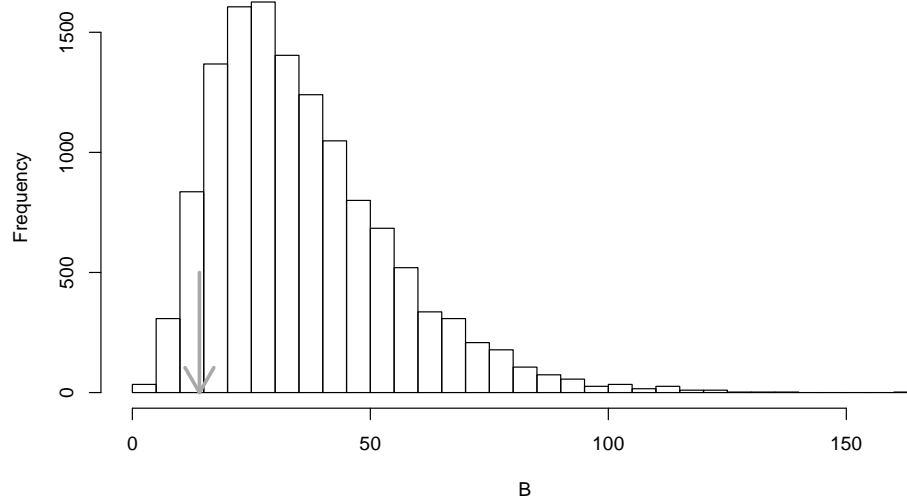

**Web Figure 11.** Distribution of imbalance score (B) over all 12870 possible randomization schemes in the R/R for vaccination study. The portion of schemes to the left of the arrow shows the constrained randomization space (candidate set size  $R = 1000$ ).
